# Supplementary material
Source: Springer Nature journal article supplement (https://www.springermedizin.de/resource/supplementary/12884_2012_588_MOESM1_ESM.pdf/9457792)
Supplement: MOESM1 [file 9457792]

### Source population

Women delivering at Ullevål and Akershus University hospitals in  
selected time periods from 1970 to 2001

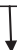

53 women were registered in the Medical Birth Registry of Norway (MBRN) with  
hyperemesis gravidarum (HG)

546 women not registered with HG in MBRN - randomly selected

(N=599)

19 women - no consent

29 women - no hospital records

(N=48)

### Final sample

48 women registered with HG in MBRN

503 not registered with HG in MBRN

(N=551)
